# Supplementary material for: Plasma procalcitonin is associated with all-cause and cancer mortality in apparently healthy men: a prospective population-based study
Source: PubMed Central journal article supplement (PMC3765625; doi:10.1186/1741-7015-11-180), 2013-08-13
Supplement: 1741-7015-11-180-S1.pdf [file 1741-7015-11-180-S1.pdf]

## Additional data file

**Additional table 1. Baseline characteristics of the excluded participants<sup>†</sup>**

| Characteristic                                | Population       | Men              | Women            |
|-----------------------------------------------|------------------|------------------|------------------|
| Number of participants (%)                    | 2772             | 1104 (40)        | 1668 (60)        |
| Age, mean (SD), y                             | 57 (6)           | 57 (6)           | 57 (6)           |
| Blood pressure, mean (SD), mm Hg              |                  |                  |                  |
| Systolic                                      | 141 (19)         | 143 (19)         | 139 (19)         |
| Diastolic                                     | 87 (10)          | 90 (10)          | 85 (9)           |
| Hypertension, No (%)                          | 1768 (63.8)      | 783 (70.9)       | 985 (59.1)       |
| Lipids, mean (SD), mmol/L                     |                  |                  |                  |
| LDL-C                                         | 4.16 (0.99)      | 4.11 (0.88)      | 4.19 (1.05)      |
| HDL-C                                         | 1.37 (0.38)      | 1.18 (0.32)      | 1.48 (0.37)      |
| Body mass index, mean (SD), kg/m <sup>2</sup> | 26.0 (4.0)       | 26.6 (3.6)       | 25.6 (4.3)       |
| Diabetes mellitus, No. (%)                    | 214 (7.7)        | 118 (10.7)       | 96 (5.8)         |
| Current smoking, No. (%)                      | 754 (27.2)       | 299 (27.1)       | 455 (27.3)       |
| Cystatin C, mean (SD), mg/L                   | 0.79 (0.17)      | 0.82 (0.18)      | 0.78 (0.16)      |
| hsCRP, median (IQR), mg/L                     | 0.15 (0.08-0.30) | 0.16 (0.09-0.31) | 0.14 (0.07-0.29) |
| PCT, median (IQR), pg/mL                      | 17 (13-22)       | 21 (16-27)       | 15 (12-19)       |

<sup>†</sup> Subjects from the CV arm of the Malmö Diet and Cancer cohort that were excluded from the present study. Abbreviations: CRP, C-reactive protein; LDL-C, low-density lipoprotein cholesterol; HDL-C, high-density lipoprotein cholesterol; PCT, procalcitonin.

**Additional table 2. Baseline characteristics of the study population by cause of death**

| Characteristic                                | Alive               | CV death            | Cancer death        | Death by other causes |
|-----------------------------------------------|---------------------|---------------------|---------------------|-----------------------|
| Number of participants (%)                    | 2888                | 121                 | 201                 | 112                   |
| Age, mean (SD), y                             | 57 (6)              | 62 (4)              | 60 (6)              | 61 (5)                |
| Blood pressure, mean (SD), mm Hg              |                     |                     |                     |                       |
| Systolic                                      | 141 (18)            | 154 (21)            | 145 (20)            | 146 (20)              |
| Diastolic                                     | 87 (9)              | 92 (10)             | 88 (9)              | 88 (10)               |
| Hypertension, No (%)                          | 1798 (62.2)         | 103 (85.1)          | 134 (66.7)          | 83 (74.8)             |
| Lipids, mean (SD), mmol/L                     |                     |                     |                     |                       |
| LDL-C                                         | 4.15 (0.97)         | 4.30 (1.04)         | 4.19 (1.02)         | 4.25 (1.07)           |
| HDL-C                                         | 1.40 (0.37)         | 1.27 (0.34)         | 1.30 (0.36)         | 1.36 (0.39)           |
| TG                                            | 1.29 (0.62)         | 1.45 (0.67)         | 1.41 (0.65)         | 1.36 (0.71)           |
| Body mass index, mean (SD), kg/m <sup>2</sup> | 25.7 (3.9)          | 26.8 (3.9)          | 26.0 (3.6)          | 24.8 (4.4)            |
| Diabetes mellitus, No. (%)                    | 209 (7.2)           | 29 (24.0)           | 18 (9.0)            | 16 (14.4)             |
| Current smoking, No. (%)                      | 691 (23.9)          | 47 (38.8)           | 80 (39.8)           | 43 (38.7)             |
| Cystatin C, mean (SD), mg/L                   | 0.76 (0.13)         | 0.87 (0.17)         | 0.78 (0.13)         | 0.84 (0.30)           |
| hsCRP, median (IQR), mg/L                     | 0.12<br>(0.06-0.26) | 0.27<br>(0.08-0.50) | 0.17<br>(0.07-0.34) | 0.17<br>(0.06-0.36)   |
| PCT, median (IQR), pg/mL                      | 16 (13-20)          | 19 (15-23)          | 18 (14-23)          | 18 (14-19)            |
| Men                                           | 18 (15-22)          | 20 (16-25)          | 20 (17-26)          | 19 (15-26)            |
| Women                                         | 14 (12-18)          | 18 (14-22)          | 15 (13-19)          | 17 (13-22)            |

Abbreviations: CRP, C-reactive protein; LDL-C, low-density lipoprotein cholesterol; HDL-C, high-density lipoprotein cholesterol; PCT, procalcitonin.
